# Supplementary material for: Causal relationship between obesity and serum testosterone status in men: A bi-directional mendelian randomization analysis
Source: PLoS One. 2017 Apr 27;12(4):e0176277. doi: 10.1371/journal.pone.0176277 (PMC5407807; doi:10.1371/journal.pone.0176277)
Supplement: S6 Table — (DOCX) [file pone.0176277.s009.docx]

| **S6 Table. Associations between testosterone SNPs and BMI when evaluated in the Giant consortium.** | | |
| --- | --- | --- |
|  | | |
| **SNPs/Risk score** | **Per allele Change in BMI, kg/m2 (95% CI)** | **P value** |
|  |  |  |
| rs6258 | 0.000 (-0.038 - 0.039) | 0.98 |
| rs12150660 | -0.011 (-0.023 - 0.001) | 0.07 |
| GRST | -0.012 (-0.029 - 0.005)* | 0.17 |
|  |  |  |
| The GIANT consortium included up to 104,349 men of European ancestry (Locke et al, Nature, 2015). The association for GRST (including SNPs rs6258 and rs12150660) was calculated as described in Ehret et al (9). * per allele change in BMI. | | |
|
